# Supplementary material for: Het signaleren, handelen en melden bij vermoedens van kindermishandeling door huisartsen
Source: Springer Nature journal article supplement (doi:10.1007/s12508-022-00372-9), 2022-11-29
Supplement: MOESM1 [file 23771186]

**Interviewvragen huisartsen**

***Algemene informatie***

1. Hoelang bent u werkzaam als huisarts?
2. Wat is uw leeftijd?

*[Zelf noteren: geslacht]*

***Signalen en vermoedens***

1. Heeft u wel eens vermoedens van kindermishandeling of verwaarlozing bij patiënten (ouders en kinderen)?

a. Indien ja, kunt u dit toelichten?

1. Hoe ontstaan deze vermoedens?

*Doorvraag:*

- 1. Zou u voorbeelden uit uw praktijk kunnen geven over hoe vermoedens van mishandeling ontstaan?
  2. Hoe speelt het “niet-pluis gevoel” een rol hierbij?

1. Op welke signalen baseert u vermoedens van kindermishandeling of verwaarlozing?

*Doorvraag:*

1. Maakt u onderscheid in signalen tussen verschillende vormen van kindermishandeling, zoals seksueel misbruik, fysieke mishandeling en emotionele mishandeling bijvoorbeeld?
2. Maakt u onderscheid tussen kindsignalen, oudersignalen, omgevingssignalen, of nog andere signalen?
3. Maakt u wel eens gebruik van hulpmiddelen bij het signaleren van - of het inschatten van risico’s op - kindermishandeling (zoals instrumenten, standaarden of vragenlijsten)? Denk ook aan hulpmiddelen voor het bevestigen van uw vermoedens van mishandeling.

*Zo ja:*

1. Welke hulpmiddelen zijn dat?
2. Wat zijn uw ervaringen met die hulpmiddelen?
3. Verbeteren deze het signaleren van mishandeling? Waarom wel/niet?
4. Verbeteren deze het handelen bij mishandeling? Waarom wel/niet?

*Zo nee:*

1. Zou u behoefte hebben aan hulpmiddelen bij het signaleren van kindermishandeling of om vermoedens van mishandeling te versterken of te bevestigen?
2. Hoe zouden die hulpmiddelen er volgens u uit moeten zien?
3. Wat doet u bij twijfels over kindermishandeling?
4. Vindt u dat u voldoende kennis en vaardigheden heeft om kindermishandeling te signaleren?

*Doorvraag:*

- 1. Vind u dat u voldoende geschoold bent om kindermishandeling te signaleren?

1. In hoeverre voelt u zich comfortabel in het bespreken van signalen van mishandeling of verwaarlozing met patiënten (ouders of kinderen)?
2. Ondervindt u moeilijkheden in het signaleren van kindermishandeling of het vormen van een oordeel over mogelijke mishandeling? Hangt samen met de volgende vraag
3. Zo ja, welke moeilijkheden?
4. Hoe zou u het signaleren van kindermishandeling willen verbeteren:
5. in het algemeen?
6. bij u in de praktijk?

***Handelen bij vermoedens van mishandeling***

1. Wat doet u wanneer u signalen ziet of vermoedens hebt van kindermishandeling?

*Doorvraag:*

- 1. Kunt u een voorbeeld noemen van de manier waarop u hebt gehandeld (of juist niet hebt gehandeld) toen u vermoedens of signalen had van kindermishandeling?
  2. In hoeverre speelt de vertrouwensrelatie een rol bij het handelen bij vermoedens of signalen?

1. Waar kunt u terecht met vermoedens of signalen van kindermishandeling?
2. Hoe doet u aan dossiervorming als u een vermoeden heeft van kindermishandeling?
   1. Patiënten kunnen tegenwoordig hun patiëntendossier inzien. Hoe heeft dit invloed op de manier waarop u aan dossiervorming doet over mishandeling?
3. Met welke partijen, instanties of professionals heeft u contact als u kindermishandeling signaleert? (*bijv. consultatiebureau artsen, jeugdgezondheidsartsen, school, etc.) -Vraag door op een partij die nog niet eerder genoemd is.*
4. Welke partijen zoeken contact met u / Waar haalt u de informatie vandaan?
5. Hoe ervaart u de samenwerking met deze partijen?

*Veilig Thuis* ***(te weinig tijd: algemene ervaringen met Veilig Thuis)***

1. Wat is uw ervaring met Veilig Thuis in het algemeen? (Hierna pas specifiek uitvragen)
2. Heeft u Veilig Thuis wel eens om advies gevraagd?
3. Zo ja: wat is uw ervaring met de adviesfunctie van Veilig Thuis?
4. Heeft u wel eens uw vermoedens van kindermishandeling gemeld bij Veilig Thuis?
5. Zo ja: wat is uw ervaring met het melden?
6. Wat is volgens u nodig voor een goede samenwerking met Veilig Thuis?

*Gebruik van de meldcode*

1. Maakt u gebruik van de meldcode? (Zo nee, ga door naar **vraag 23**)
2. Wat is uw ervaring met de stappen van de meldcode?
3. In stap 4 van de meldcode wordt gevraagd een weging te maken van de aard en ernst van de kindermishandeling. Hoe maakt u deze weging?
4. Let u hierbij op risico- en beschermende factoren? Zo ja, op welke?
5. Maakt u wel eens gebruik van een risicotaxatie-instrument om een weging te maken van de aard en ernst van kindermishandeling?

*Zo ja:*

1. Wat zijn uw ervaringen met deze instrumenten?

*Zo nee:*

1. Zou u behoefte hebben aan instrumenten die u hierin ondersteunen?
2. Ondervindt u problemen in de stappen van de meldcode?

*Zo ja:*

1. Welke problemen?
2. Wat zou u nodig hebben om deze problemen op te lossen?
3. Sinds ruim een jaar is het gebruik van de meldcode wettelijk verplicht. Heeft dat invloed gehad op hoe u met de meldcode omgaat?
4. Wat zijn knelpunten die u ervaart bij het handelen in geval van kindermishandeling?
5. Vind u dat u voldoende kennis en vaardigheden heeft om op de juiste manier te handelen wanneer u vermoedens heeft van kindermishandeling?
6. Heeft u nog op- of aanmerkingen ten opzichte van dit interview?
   1. Zijn er punten die u heeft gemist in het interview of waarvan u denkt dat het extra belangrijk is om deze nog even te noemen?
